# Supplementary material for: Synthesis, characterization of the amido-conjugates of 1,1′-methylene-bis(2-naphthol) and recognition of Cu2+ in aqueous acetonitrile
Source: Royal Society of Chemistry journal article supplement (doi:10.1039/c2nj40409e), 2012-01-01
Supplement: c2nj40409e.pdf [file c2nj40409e.pdf]

## Synthesis, characterization of the amido-conjugates of 1, 1'-methylene-bis(2-naphthol) and the recognition of Cu<sup>2+</sup> in aqueous acetonitrile

Garima Singh Baghel, Jugun Prakash Chinta and Chebrolu P. Rao\*

*Bioinorganic Laboratory, Department of Chemistry, Indian Institute of Technology  
Bombay, Mumbai 400 076, India*

*cprao@iitb.ac.in*

### Electronic Supplementary Information

| Contents                                                                                           | Page No |
|----------------------------------------------------------------------------------------------------|---------|
| S01. Characterization data for L <sub>1</sub> – L <sub>5</sub> , L <sub>6</sub> and L <sub>7</sub> | 2       |
| S02. Single crystal XRD structure of L <sub>2</sub>                                                | 9       |
| S03. Fluorescence titration studies of L <sub>1</sub> -L <sub>7</sub> with metal ions              | 11      |
| S04. Control fluorescence titration studies                                                        | 16      |
| S05. Minimum detection limit experiment                                                            | 16      |
| S06. Absorption titration studies                                                                  | 17      |
| S07. Job's plots                                                                                   | 18      |
| S08. Mass spectral studies of L <sub>6</sub> and L <sub>7</sub> with Cu <sup>2+</sup>              | 18      |
| S09. Competitive metal ion titrations                                                              | 19      |
| S10. <sup>1</sup> H NMR titration studies                                                          | 20      |
| S11. Computational studies                                                                         | 21      |

**S01.** Characterization data for L<sub>1</sub> – L<sub>5</sub>, L<sub>6</sub> and L<sub>7</sub>

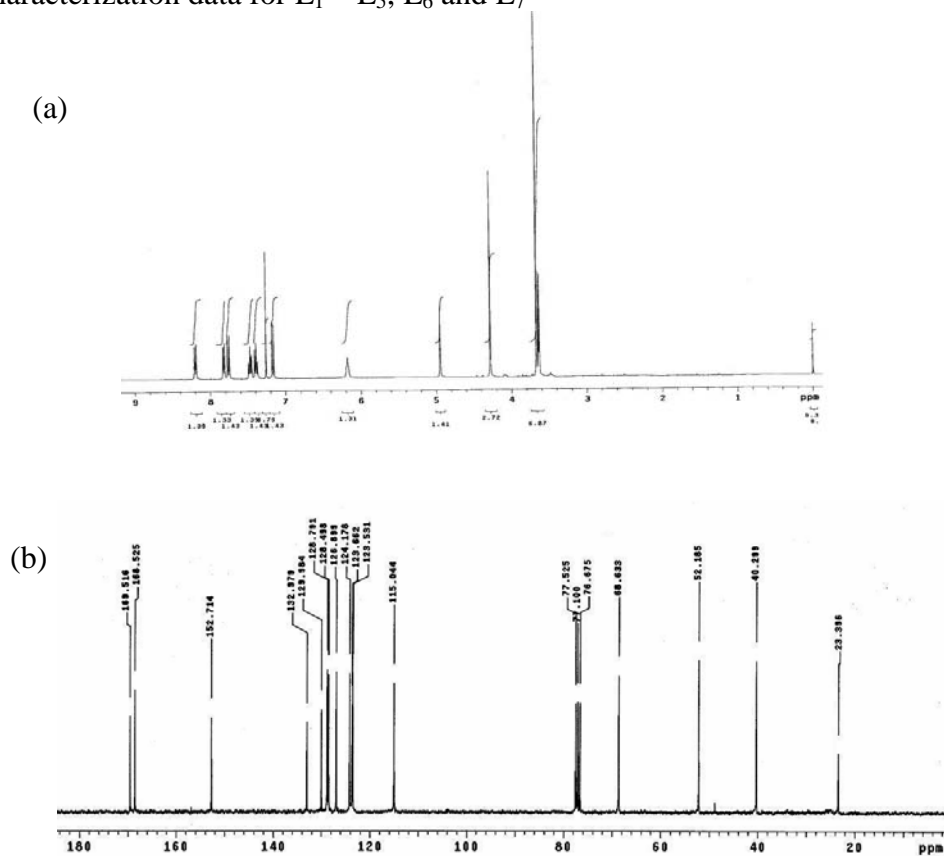

**Elemental Composition Report**

Page 1

(c)

**Single Mass Analysis (displaying only valid results)**

Tolerance = 20.0 PPM / DBE: min = -1.5, max = 50.0

Isotope cluster parameters: Separation = 1.0 Abundance = 1.0%

Monoisotopic Mass, Odd and Even Electron Ions

169 formula(e) evaluated with 1 results within limits (up to 50 closest results for each mass)

Micromass : Q-ToF micro (YA-105)

Dept. Of Chemistry I.I.T.(B)

14-Jun-201114:44:40

C31H30N2O8

CPR-MBN-GLY-ES 42 (0.414) AM (Med.5, Ht.5000.0,556.28,1.00); Cm (42:50)

TOF MS ES+

368

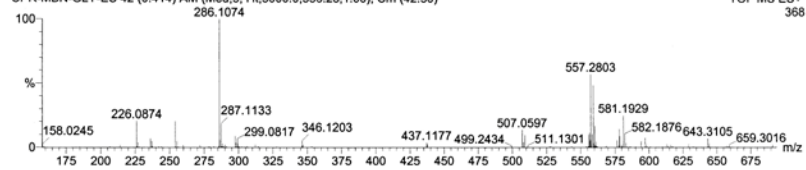

Minimum:

Maximum:

200.0 20.0 -1.5

50.0 50.0

| Mass     | Calc. Mass | mDa | PPM | DBE  | Score | Formula       |
|----------|------------|-----|-----|------|-------|---------------|
| 559.2089 | 559.2080   | 0.9 | 1.6 | 17.5 | 1     | C31 H31 N2 O8 |

**Figure S01(a).** Characterization of L<sub>1</sub> (a) <sup>1</sup>H NMR, (b) <sup>13</sup>C NMR and (c) HRMS

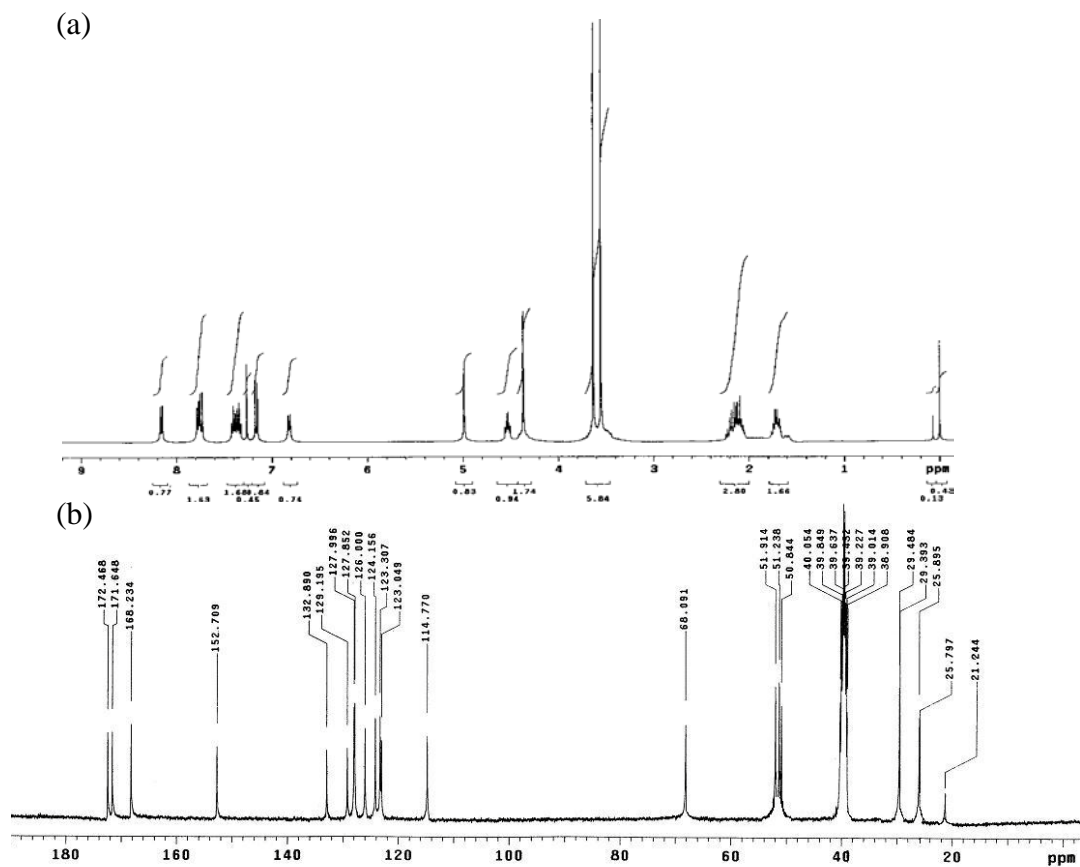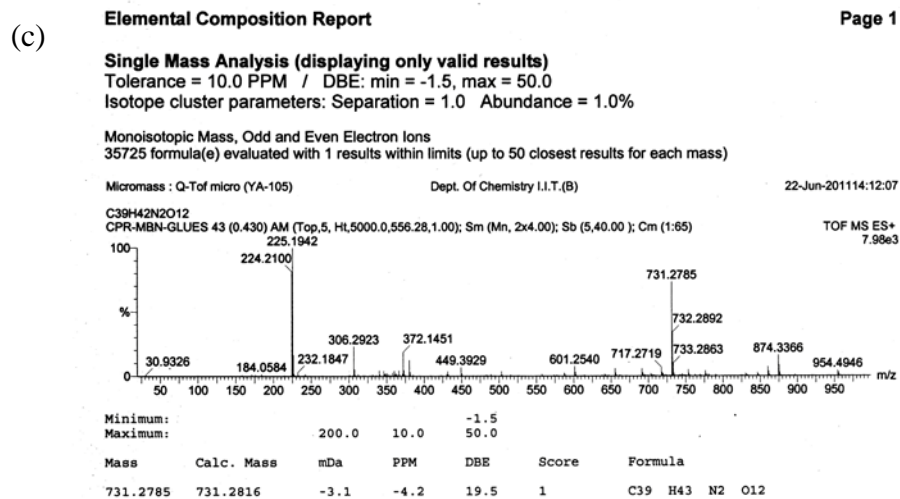

**Figure S01(b).** Characterization of  $L_2$ : (a)  $^1\text{H}$  NMR, (b)  $^{13}\text{C}$  NMR and (c) HRMS

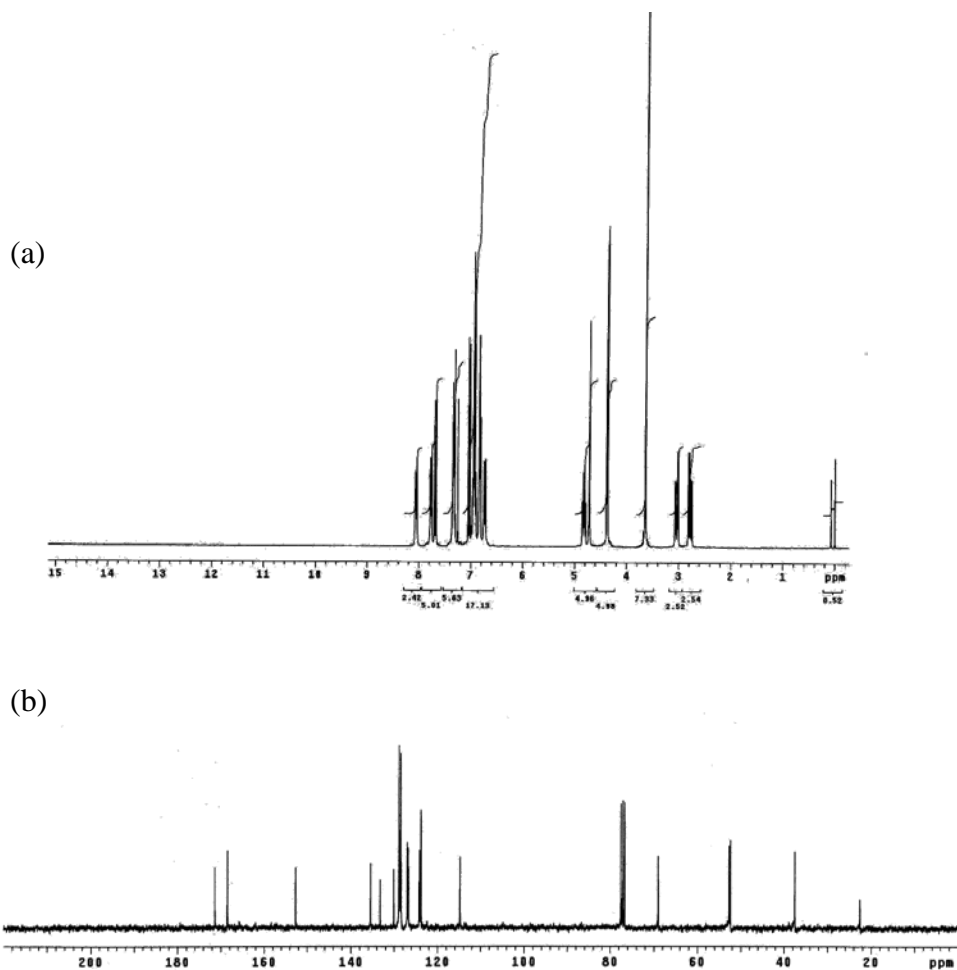

Elemental Composition Report

Page 1

(c) **Single Mass Analysis (displaying only valid results)**  
 Tolerance = 20.0 PPM / DBE: min = -1.5, max = 50.0  
 Isotope cluster parameters: Separation = 1.0 Abundance = 1.0%

Monoisotopic Mass, Odd and Even Electron Ions  
 19 formula(e) evaluated with 1 results within limits (up to 50 closest results for each mass)

Micromass : Q-ToF micro (YA-105) Dept. Of Chemistry I.I.T.(B) 14-Jun-201115:10:20

C45H42N2O8  
 CPR-MBN-PHE-ES 2 (0.020) AM (Top,5, Ht,5000.0,556.28,1.00); Sm (Mn, 2x4.00); Sb (5,40.00); Cm (1:22) TOF MS ES+ 2.74e3

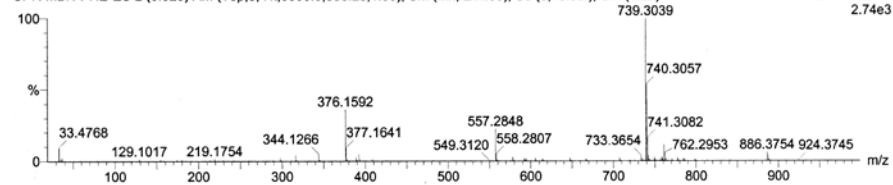

| Mass     | Calc. Mass | mDa | PPM | DBE  | Score | Formula       |
|----------|------------|-----|-----|------|-------|---------------|
| 739.3039 | 739.3019   | 2.0 | 2.6 | 25.5 | 1     | C45 H43 N2 O8 |

**Figure S01(c).** Characterization of  $L_3$ : (a)  $^1\text{H}$  NMR, (b)  $^{13}\text{C}$  NMR and (c) HRMS

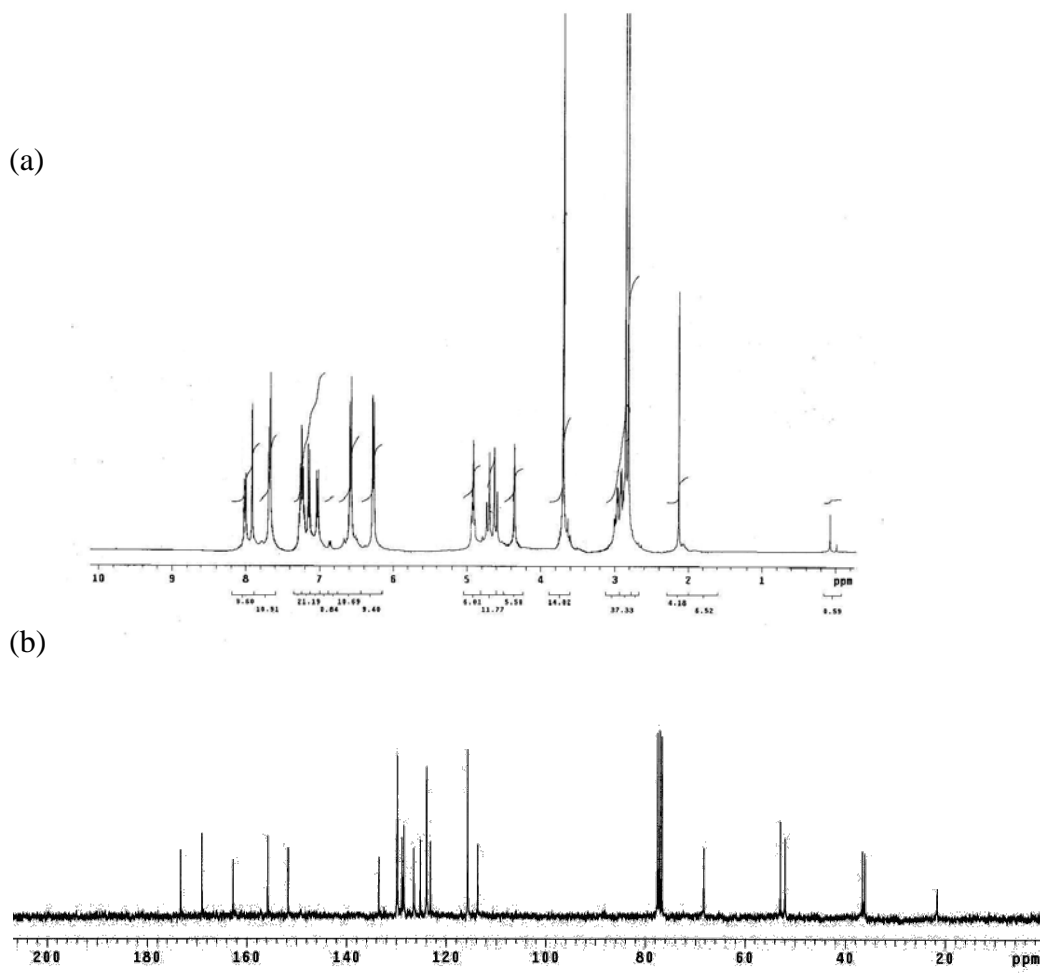

### Elemental Composition Report

Page 1

(c)

#### Single Mass Analysis (displaying only valid results)

Tolerance = 20.0 PPM / DBE: min = -1.5, max = 50.0

Isotope cluster parameters: Separation = 1.0 Abundance = 1.0%

Monoisotopic Mass, Odd and Even Electron Ions

25 formula(e) evaluated with 1 results within limits (up to 50 closest results for each mass)

Micromass : Q-ToF micro (YA-105)

Dept. Of Chemistry I.I.T.(B)

14-Jun-201115:22:05

C45H42N2O10

CPR-MBN-TYR-ES 7 (0.069) AM (Cen,5, 80.00, Ht,5000.0,556.28,1.00); Sb (5,40.00); Cm (1:36)

TOF MS ES+

9.67e3

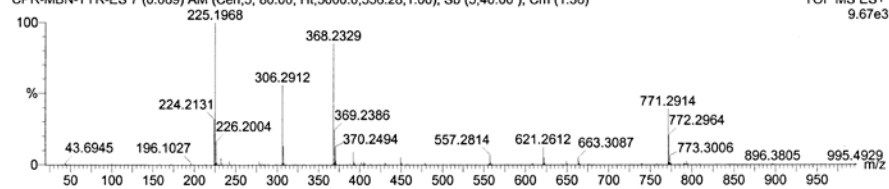

Minimum:

Maximum: 200.0 20.0 -1.5

| Mass     | Calc. Mass | mDa  | PPM  | DBE  | Score | Formula        |
|----------|------------|------|------|------|-------|----------------|
| 771.2914 | 771.2918   | -0.4 | -0.5 | 25.5 | 1     | C45 H43 N2 O10 |

**Figure S01(d).** Characterization of **L<sub>4</sub>**: (a) <sup>1</sup>H NMR, (b) <sup>13</sup>C NMR and (c) HRMS

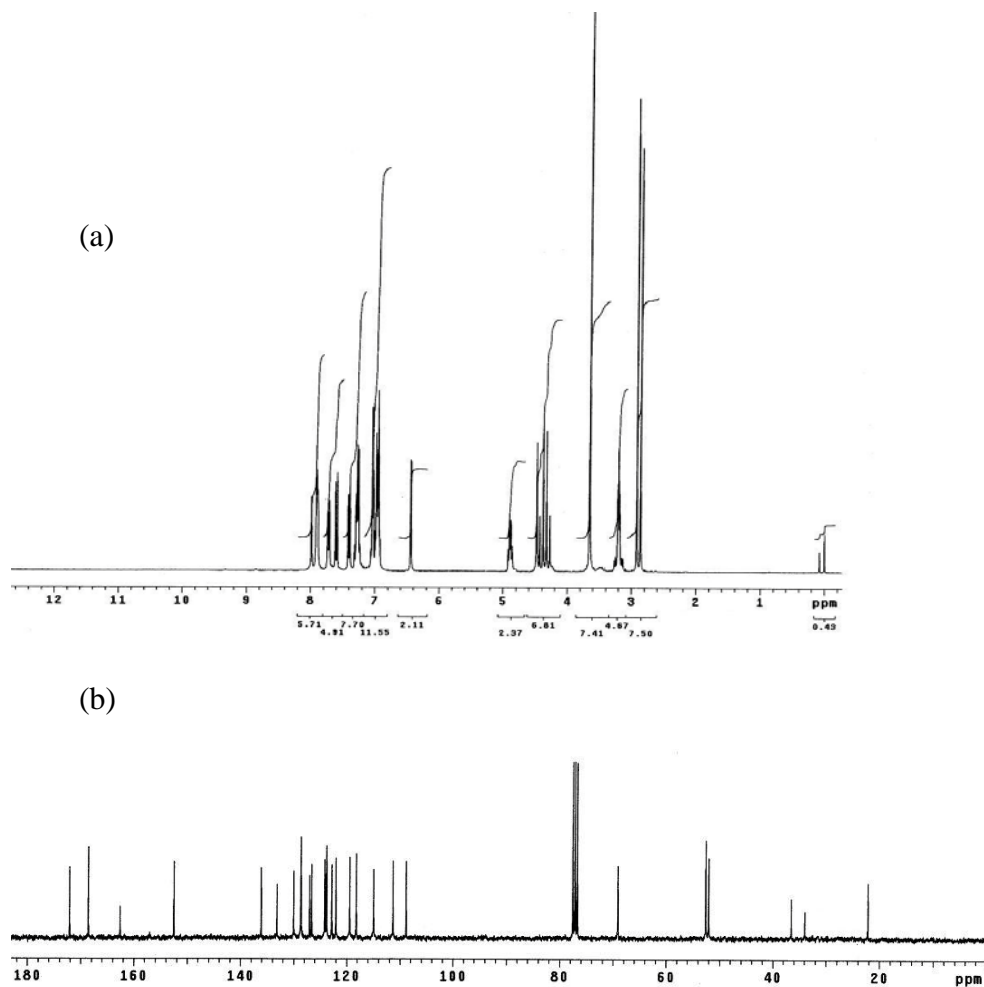

Elemental Composition Report

Page 1

(c) **Single Mass Analysis (displaying only valid results)**  
 Tolerance = 20.0 PPM / DBE: min = -1.5, max = 50.0  
 Isotope cluster parameters: Separation = 1.0 Abundance = 1.0%

Monoisotopic Mass, Odd and Even Electron Ions  
 305 formula(e) evaluated with 1 results within limits (up to 50 closest results for each mass)

Micromass : Q-ToF micro (YA-105) Dept. Of Chemistry I.I.T.(B) 14-Jun-201114:56:06

C49H44N4O8  
 CPR-MBN-TRP-ES 26 (0.260) AM (Cen.5, 80.00, Ht.5000.0,556.28,1.00); Sm (Md, 4.00); Sb (5,40.00); Cm (1:26) TOF MS ES+ 3.33e3

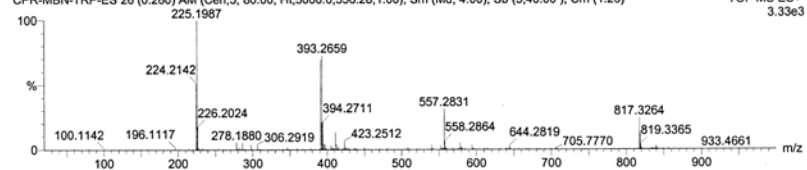

| Mass     | Calc. Mass | mDa | PPM | DBE  | Score | Formula       |
|----------|------------|-----|-----|------|-------|---------------|
| 817.3264 | 817.3237   | 2.7 | 3.3 | 29.5 | 1     | C49 H45 N4 O8 |

Figure S01(e). Characterization of  $L_5$ : (a)  $^1\text{H}$  NMR, (b)  $^{13}\text{C}$  NMR and (c) HRMS

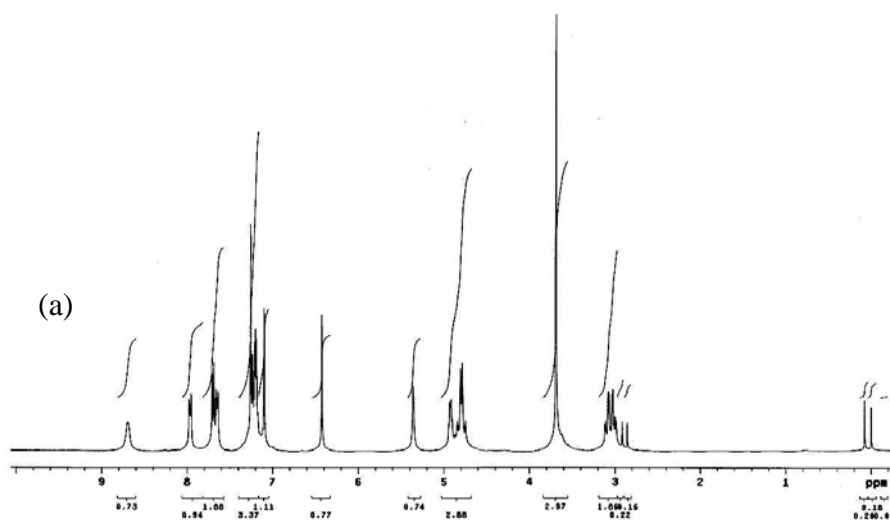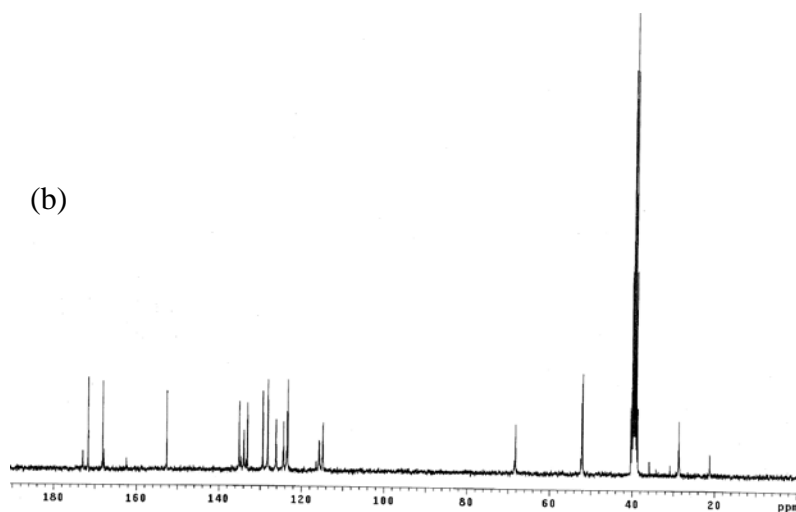

(c)

**Elemental Composition Report**

Page 1

**Single Mass Analysis (displaying only valid results)**

Tolerance = 20.0 PPM / DBE: min = -1.5, max = 50.0

Isotope cluster parameters: Separation = 1.0 Abundance = 1.0%

Monoisotopic Mass, Odd and Even Electron Ions

381 formula(e) evaluated with 1 results within limits (up to 50 closest results for each mass)

Micromass : Q-ToF micro (YA-105)

Dept. Of Chemistry I.I.T.(B)

14-Jun-201114:26:17

C39H38N6O8

CPR-MBN-HIS-ES 23 (0.227) AM (Cen.5, 80.00, Ht,5000.0,556.28,1.00); Sb (5,40.00); Cm (1:34)

TOF MS ES+

5.55e3

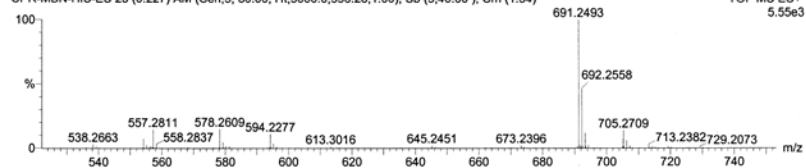

| Minimum: | 200.0      | 20.0 | -1.5 |      |       |               |  |
|----------|------------|------|------|------|-------|---------------|--|
| Maximum: |            |      | 50.0 |      |       |               |  |
| Mass     | Calc. Mass | mDa  | PPM  | DBE  | Score | Formula       |  |
| 719.2842 | 719.2829   | 1.3  | 1.8  | 23.5 | 1     | C39 H39 N6 O8 |  |

**Figure S01(f).** Characterization of  $L_6$ : (a)  $^1\text{H}$  NMR, (b)  $^{13}\text{C}$  NMR and (c) HRMS

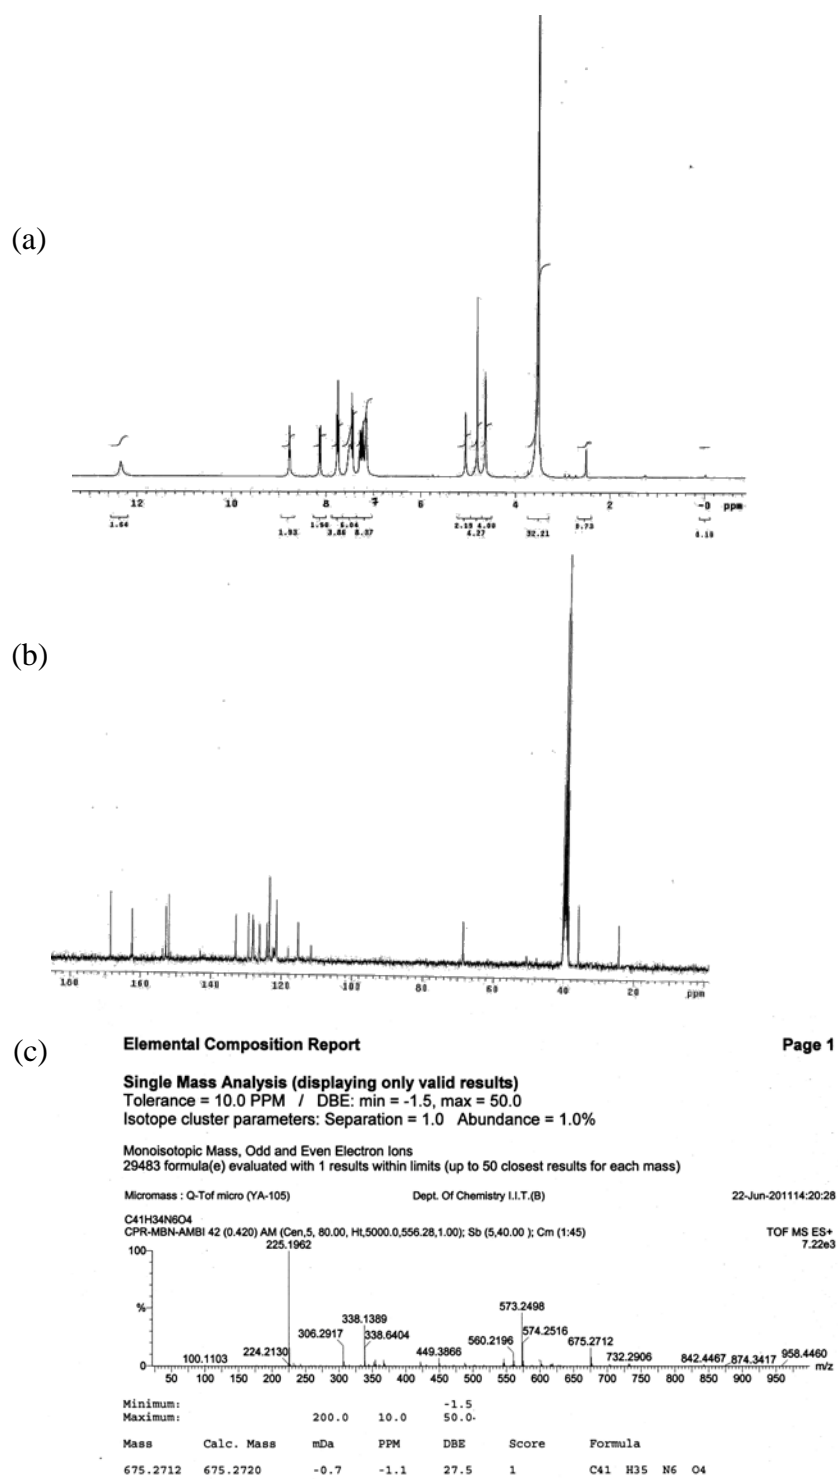

**Figure S01(g).** Characterization of **L7**: (a)  $^1\text{H}$  NMR, (b)  $^{13}\text{C}$  NMR and (c) HRMS



**S02.** Single crystal XRD structure for ligand **L<sub>2</sub>**.

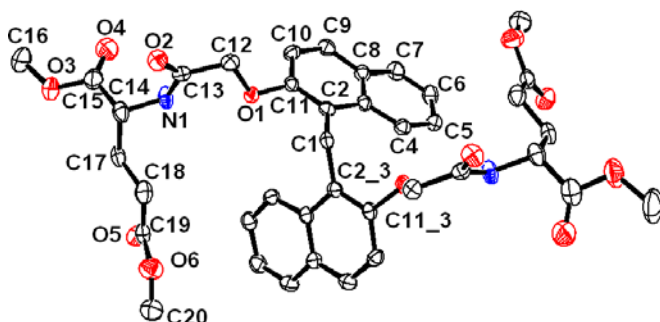

**Table S02(a).** Table of bond lengths (Å) and bond angles (°) for ligand **L<sub>2</sub>**.

|             |          |              |          |              |          |
|-------------|----------|--------------|----------|--------------|----------|
| O(1)-C(11)  | 1.402(3) | C(17)-C(18)  | 1.524(4) | C(10)-H(10)  | 0.9300   |
| O(1)-C(12)  | 1.422(3) | C(17)-H(17A) | 0.9700   | C(12)-C(13)  | 1.502(3) |
| O(2)-C(13)  | 1.239(3) | C(17)-H(17B) | 0.9700   | C(12)-H(12A) | 0.9700   |
| O(3)-C(15)  | 1.342(4) | C(18)-C(19)  | 1.491(4) | C(12)-H(12B) | 0.9700   |
| O(3)-C(16)  | 1.450(4) | C(18)-H(18A) | 0.9700   | C(14)-C(15)  | 1.512(4) |
| O(4)-C(15)  | 1.202(4) | C(18)-H(18B) | 0.9700   | C(14)-C(17)  | 1.529(4) |
| O(5)-C(19)  | 1.196(3) | C(20)-H(20A) | 0.9600   | C(14)-H(14)  | 0.9800   |
| O(6)-C(19)  | 1.342(3) | C(20)-H(20B) | 0.9600   | C(16)-H(16A) | 0.9600   |
| O(6)-C(20)  | 1.455(4) | C(20)-H(20C) | 0.9600   | C(16)-H(16B) | 0.9600   |
| N(1)-C(13)  | 1.334(3) | C(7)-C(8)    | 1.419(4) | C(16)-H(16C) | 0.9600   |
| N(1)-C(14)  | 1.443(3) | C(7)-H(7)    | 0.9300   | C(2)-C(11)   | 1.368(3) |
| N(1)-H(1N)  | 0.83(3)  | C(8)-C(9)    | 1.416(4) | C(2)-C(3)    | 1.435(4) |
| C(1)-C(2)#1 | 1.522(3) | C(9)-C(10)   | 1.355(4) | C(3)-C(4)    | 1.422(3) |
| C(1)-C(2)   | 1.522(3) | C(9)-H(9)    | 0.9300   | C(3)-C(8)    | 1.427(4) |
| C(1)-H(1)   | 0.95(2)  | C(10)-C(11)  | 1.403(4) | C(4)-C(5)    | 1.368(4) |
| C(5)-H(5)   | 0.9300   | C(6)-C(7)    | 1.365(3) | C(4)-H(4)    | 0.9300   |
| C(5)-C(6)   | 1.398(4) | C(6)-H(6)    | 0.9300   |              |          |

|                  |            |                     |          |                     |          |
|------------------|------------|---------------------|----------|---------------------|----------|
| C(11)-O(1)-C(12) | 118.16(19) | H(12A)-C(12)-H(12B) | 108.3    | C(19)-C(18)-H(18B)  | 109.1    |
| C(15)-O(3)-C(16) | 116.1(3)   | O(2)-C(13)-N(1)     | 123.3(3) | C(17)-C(18)-H(18B)  | 109.1    |
| C(19)-O(6)-C(20) | 115.7(2)   | O(2)-C(13)-C(12)    | 120.1(2) | H(18A)-C(18)-H(18B) | 107.9    |
| C(13)-N(1)-C(14) | 122.7(2)   | N(1)-C(13)-C(12)    | 116.6(2) | O(5)-C(19)-O(6)     | 122.8(3) |
| C(13)-N(1)-H(1N) | 116.4(18)  | N(1)-C(14)-C(15)    | 111.0(3) | O(5)-C(19)-C(18)    | 125.6(3) |
| C(14)-N(1)-H(1N) | 120.5(18)  | N(1)-C(14)-C(17)    | 111.2(2) | O(6)-C(19)-C(18)    | 111.7(2) |
| C(2)#1-C(1)-C(2) | 120.8(3)   | C(15)-C(14)-C(17)   | 110.9(2) | O(6)-C(20)-H(20A)   | 109.5    |
| C(2)#1-C(1)-H(1) | 106.9(13)  | N(1)-C(14)-H(14)    | 107.9    | O(6)-C(20)-H(20B)   | 109.5    |
| C(2)-C(1)-H(1)   | 108.9(13)  | C(15)-C(14)-H(14)   | 107.9    | H(20A)-C(20)-H(20B) | 109.5    |
| C(11)-C(2)-C(3)  | 117.6(2)   | C(17)-C(14)-H(14)   | 107.9    | O(6)-C(20)-H(20C)   | 109.5    |
| C(11)-C(2)-C(1)  | 120.2(2)   | O(4)-C(15)-O(3)     | 123.6(3) | H(20A)-C(20)-H(20C) | 109.5    |
| C(3)-C(2)-C(1)   | 122.1(2)   | O(4)-C(15)-C(14)    | 126.6(3) | H(20B)-C(20)-H(20C) | 109.5    |
| C(4)-C(3)-C(8)   | 117.4(2)   | O(3)-C(15)-C(14)    | 109.8(3) | C(10)-C(9)-C(8)     | 120.3(3) |
| C(4)-C(3)-C(2)   | 123.1(2)   | O(3)-C(16)-H(16A)   | 109.5    | C(10)-C(9)-H(9)     | 119.8    |
| C(8)-C(3)-C(2)   | 119.5(2)   | O(3)-C(16)-H(16B)   | 109.5    | C(8)-C(9)-H(9)      | 119.8    |
| C(5)-C(4)-C(3)   | 121.1(3)   | H(16A)-C(16)-H(16B) | 109.5    | C(9)-C(10)-C(11)    | 120.0(2) |
| C(5)-C(4)-H(4)   | 119.5      | O(3)-C(16)-H(16C)   | 109.5    | C(9)-C(10)-H(10)    | 120.0    |
| C(3)-C(4)-H(4)   | 119.5      | H(16A)-C(16)-H(16C) | 109.5    | C(11)-C(10)-H(10)   | 120.0    |
| C(4)-C(5)-C(6)   | 121.4(2)   | H(16B)-C(16)-H(16C) | 109.5    | C(2)-C(11)-O(1)     | 118.2(2) |
| C(4)-C(5)-H(5)   | 119.3      | C(18)-C(17)-C(14)   | 112.7(2) | C(2)-C(11)-C(10)    | 123.0(2) |
| C(6)-C(5)-H(5)   | 119.3      | C(18)-C(17)-H(17A)  | 109.1    | O(1)-C(11)-C(10)    | 118.5(2) |
| C(7)-C(6)-C(5)   | 119.3(3)   | C(14)-C(17)-H(17A)  | 109.1    | O(1)-C(12)-C(13)    | 108.8(2) |
| C(7)-C(6)-H(6)   | 120.3      | C(18)-C(17)-H(17B)  | 109.1    | O(1)-C(12)-H(12A)   | 109.9    |
| C(5)-C(6)-H(6)   | 120.3      | C(14)-C(17)-H(17B)  | 109.1    | C(13)-C(12)-H(12A)  | 109.9    |
| C(6)-C(7)-C(8)   | 121.3(3)   | H(17A)-C(17)-H(17B) | 107.8    | O(1)-C(12)-H(12B)   | 109.9    |
| C(6)-C(7)-H(7)   | 119.4      | C(19)-C(18)-C(17)   | 112.3(2) | C(13)-C(12)-H(12B)  | 109.9    |
| C(8)-C(7)-H(7)   | 119.4      | C(19)-C(18)-H(18A)  | 109.1    | C(9)-C(8)-C(3)      | 119.2(2) |
| C(9)-C(8)-C(7)   | 121.4(3)   | C(17)-C(18)-H(18A)  | 109.1    | C(7)-C(8)-C(3)      | 119.4(2) |

Symmetry transformations used to generate equivalent atoms:

#1 x,-y,-z+2

**Table S02(b).** Table of torsion angles (°) for ligand **L<sub>2</sub>**.

|                        |           |                         |           |
|------------------------|-----------|-------------------------|-----------|
| C(2)#1-C(1)-C(2)-C(11) | 121.9(2)  | N(1)-C(14)-C(17)-C(18)  | 58.9(3)   |
| C(2)#1-C(1)-C(2)-C(3)  | -61.6(2)  | C(15)-C(14)-C(17)-C(18) | -177.2(2) |
| C(11)-C(2)-C(3)-C(4)   | -179.0(2) | C(14)-C(17)-C(18)-C(19) | -176.6(2) |
| C(1)-C(2)-C(3)-C(4)    | 4.4(4)    | C(20)-O(6)-C(19)-O(5)   | 0.5(4)    |
| C(11)-C(2)-C(3)-C(8)   | -0.2(4)   | C(20)-O(6)-C(19)-C(18)  | -179.0(2) |
| C(1)-C(2)-C(3)-C(8)    | -176.8(2) | C(17)-C(18)-C(19)-O(5)  | 23.0(4)   |
| C(8)-C(3)-C(4)-C(5)    | -4.1(4)   | C(17)-C(18)-C(19)-O(6)  | -157.5(2) |
| C(2)-C(3)-C(4)-C(5)    | 174.7(2)  | C(12)-O(1)-C(11)-C(10)  | -68.3(3)  |
| C(3)-C(4)-C(5)-C(6)    | 0.9(4)    | C(9)-C(10)-C(11)-C(2)   | 4.5(4)    |
| C(4)-C(5)-C(6)-C(7)    | 1.9(4)    | C(9)-C(10)-C(11)-O(1)   | -168.4(2) |
| C(5)-C(6)-C(7)-C(8)    | -1.4(4)   | C(11)-O(1)-C(12)-C(13)  | 160.7(2)  |
| C(6)-C(7)-C(8)-C(9)    | 178.8(3)  | C(14)-N(1)-C(13)-O(2)   | -2.5(4)   |
| C(6)-C(7)-C(8)-C(3)    | -2.0(4)   | C(14)-N(1)-C(13)-C(12)  | 177.6(2)  |
| C(4)-C(3)-C(8)-C(9)    | -176.2(2) | O(1)-C(12)-C(13)-O(2)   | 155.1(2)  |
| C(2)-C(3)-C(8)-C(9)    | 5.0(4)    | O(1)-C(12)-C(13)-N(1)   | -25.0(3)  |
| C(4)-C(3)-C(8)-C(7)    | 4.6(4)    | C(13)-N(1)-C(14)-C(15)  | 91.6(3)   |
| C(2)-C(3)-C(8)-C(7)    | -174.2(2) | C(13)-N(1)-C(14)-C(17)  | -144.5(3) |
| C(7)-C(8)-C(9)-C(10)   | 174.0(3)  | C(16)-O(3)-C(15)-O(4)   | -1.0(5)   |
| C(3)-C(8)-C(9)-C(10)   | -5.2(4)   | C(16)-O(3)-C(15)-C(14)  | 179.5(3)  |

|                       |          |                        |           |
|-----------------------|----------|------------------------|-----------|
| C(8)-C(9)-C(10)-C(11) | 0.6(4)   | N(1)-C(14)-C(15)-O(4)  | 12.4(4)   |
| C(3)-C(2)-C(11)-O(1)  | 168.3(2) | C(17)-C(14)-C(15)-O(4) | -111.7(3) |
| C(1)-C(2)-C(11)-O(1)  | -15.0(3) | N(1)-C(14)-C(15)-O(3)  | -168.2(2) |
| C(3)-C(2)-C(11)-C(10) | -4.6(4)  | C(17)-C(14)-C(15)-O(3) | 67.7(3)   |
| C(1)-C(2)-C(11)-C(10) | 172.1(2) | C(12)-O(1)-C(11)-C(2)  | 118.4(2)  |

Symmetry transformations used to generate equivalent atoms:

#1 x,-y,-z+2

**S03.** Fluorescence titration studies of **L<sub>1</sub>-L<sub>7</sub>** with metal ions

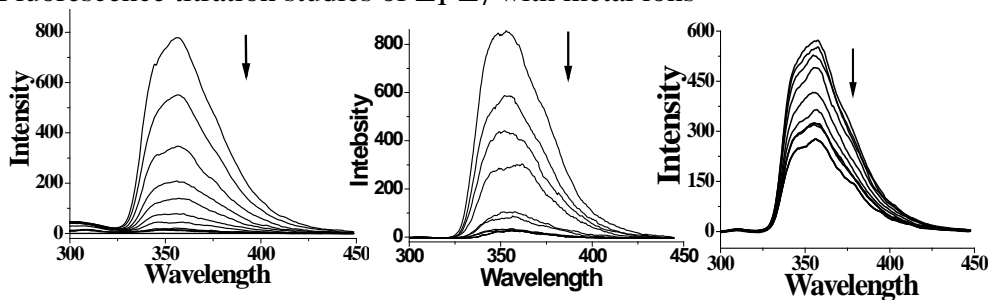

**Figure S03(a).** Fluorescence spectral traces obtained during the titration of L with  $\text{Cu}^{2+}$  in aqueous acetonitrile solution (1:1): (a) for **L<sub>7</sub>**; (b) for **L<sub>6</sub>**; (c) for **L<sub>5</sub>**.

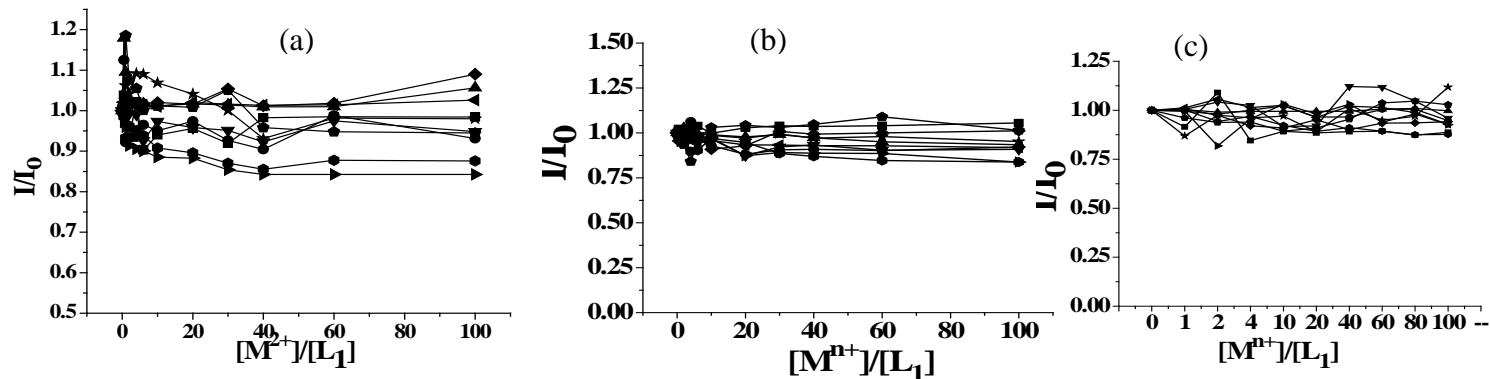

**Figure S03(b).** Plot of relative fluorescence intensity as a function of mole ratio of metal ion to the ligand concentration in different solvent systems. This is done for all the metal ions for which the titrations were carried out. (a) in  $CH_3OH$ ; (b) in  $CH_3CN$ ; (c) and  $CH_3CN:H_2O (1:1)$ . The symbols correspond to,  $\blacksquare$ = $Na^+$ ;  $\bullet$ = $K^+$ ;  $\blacktriangle$ = $Mg^{2+}$ ;  $\blacktriangledown$ = $Ca^{2+}$ ;  $\blacktriangleleft$ = $Mn^{2+}$ ;  $\blacktriangleright$ = $Fe^{2+}$ ;  $\blacklozenge$ = $Co^{2+}$ ;  $\blacklozenge$ = $Ni^{2+}$ ;  $\bullet$ = $Cu^{2+}$  and  $\star$ = $Zn^{2+}$ .

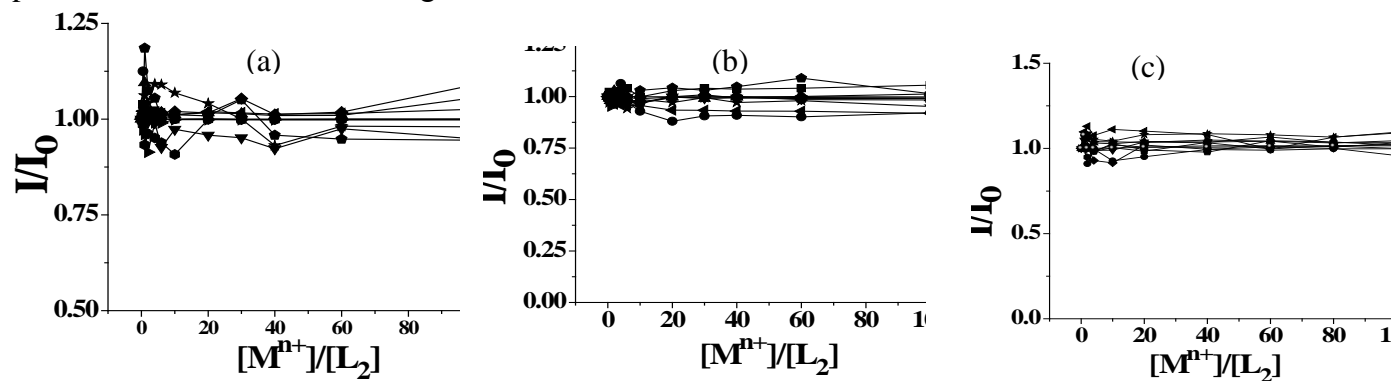

**Figure S03(c).** Plot of relative fluorescence intensity as a function of mole ratio of metal ion to the ligand concentration in different solvent systems. (a) in  $CH_3OH$ ; (b) in  $CH_3CN$ ; (c) and  $CH_3CN:H_2O (1:1)$ . The symbols carry same meaning as that given in **Figure S3(b)**.

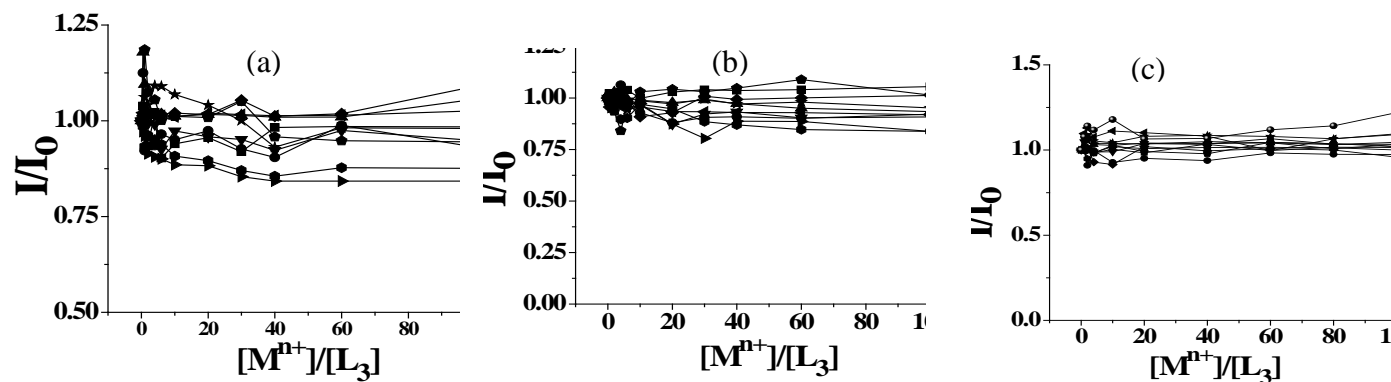

**Figure S03(d).** Plot of relative fluorescence intensity as a function of mole ratio of metal ion to the ligand concentration in different solvent systems. (a) in  $CH_3OH$ ; (b) in  $CH_3CN$ ; (c) and  $CH_3CN:H_2O (1:1)$ . The symbols carry same meaning as that given in **Figure S3(b)**.

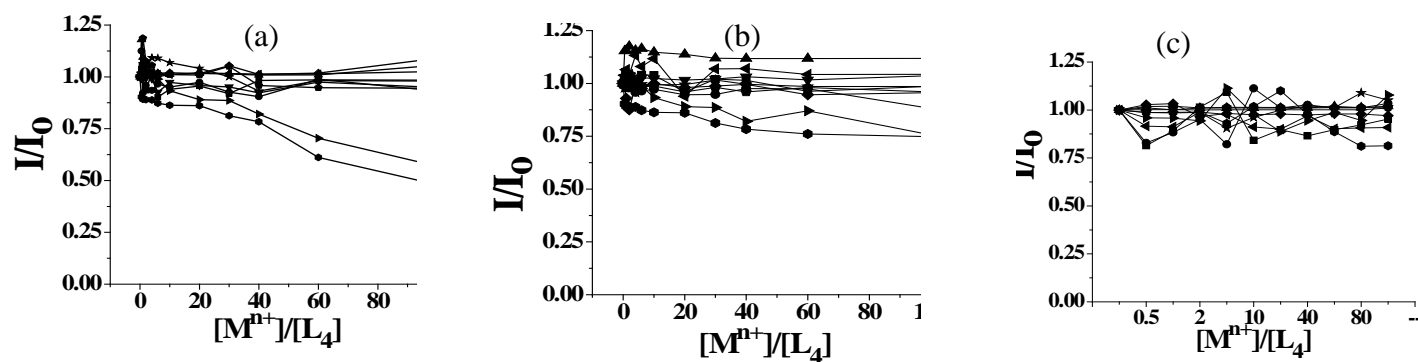

**Figure S03(e).** Plot of relative fluorescence intensity as a function of mole ratio of metal ion to the ligand concentration in different solvent systems. (a) in  $CH_3OH$ ; (b) in  $CH_3CN$ ; (c) and  $CH_3CN:H_2O (1:1)$ . The symbols carry same meaning as that given in **Figure S3(b)**.

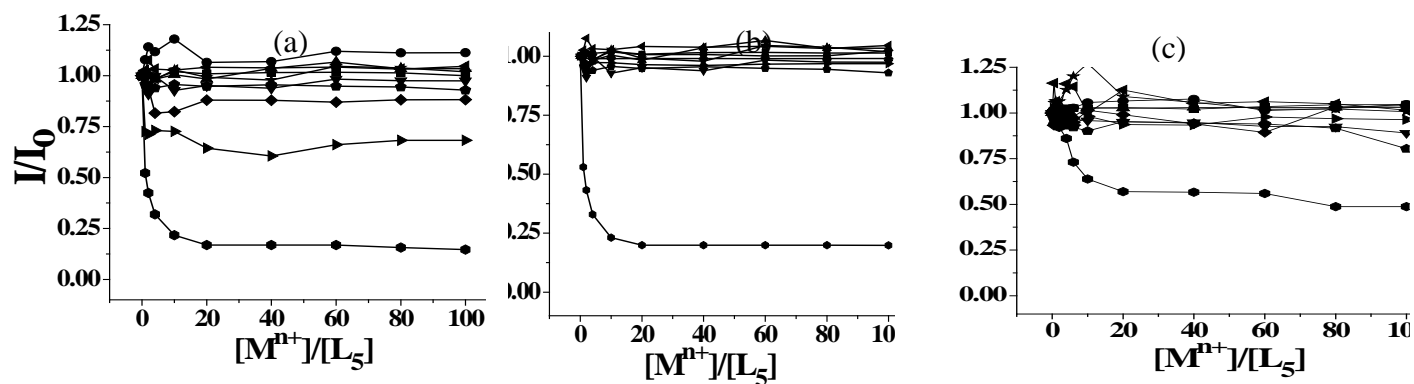

**Figure S03(f).** Plot of relative fluorescence intensity as a function of mole ratio of metal ion to the ligand concentration in different solvent systems. (a) in  $CH_3OH$ ; (b) in  $CH_3CN$ ; (c) and  $CH_3CN:H_2O (1:1)$ . The symbols carry same meaning as that given in **Figure S3(b)**.

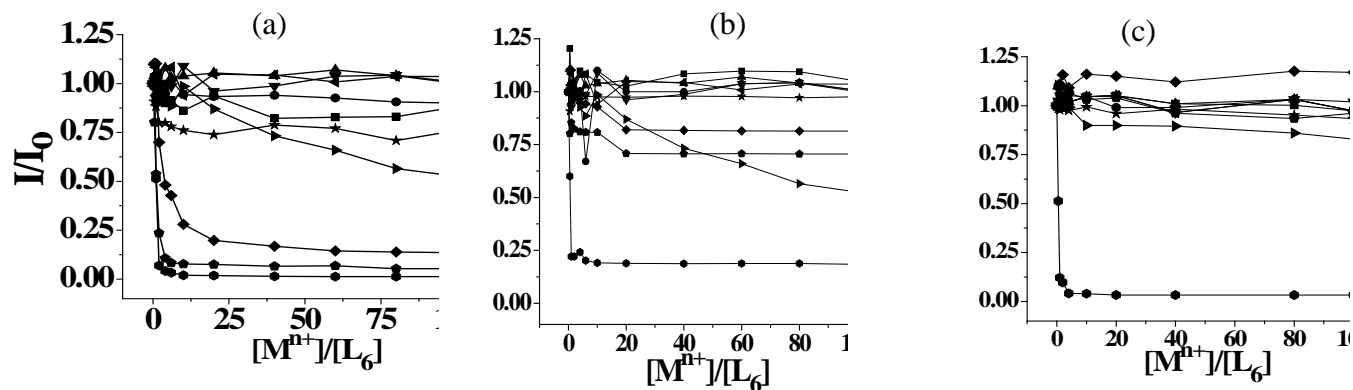

**Figure S03(g).** Plot of relative fluorescence intensity as a function of mole ratio of metal ion to the ligand concentration in different solvent systems. (a) in  $CH_3OH$ ; (b) in  $CH_3CN$ ; (c) and  $CH_3CN:H_2O (1:1)$ . The symbols carry same meaning as that given in **Figure S3(b)**.

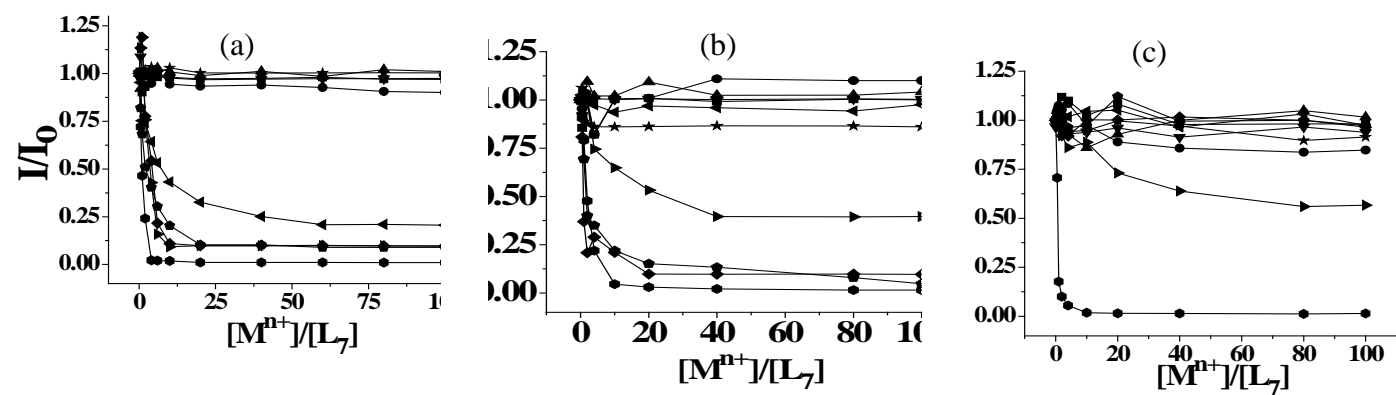

**Figure S03(h).** Plot of relative fluorescence intensity as a function of mole ratio of metal ion to the ligand concentration in different solvent systems. (a) in  $\text{CH}_3\text{OH}$ ; (b) in  $\text{CH}_3\text{CN}$ ; (c) and  $\text{CH}_3\text{CN}:\text{H}_2\text{O}$  (1:1). The symbols carry same meaning as that given in **Figure S3(b)**.

#### S04. Control fluorescence titration studies

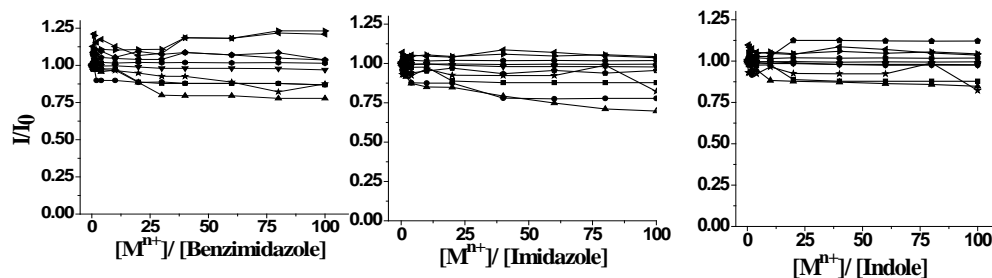

**Figure S04.** Plots of relative fluorescence intensity ( $I/I_0$ ) vs.  $[M^{n+}]/[\text{Control molecules}]$  mole ratios: (a) Titration of benzimidazole by  $M^{n+}$ ; (b) Titration of imidazole by  $M^{n+}$ ; (c) Titration of indole by  $M^{n+}$ . The symbols correspond to,  $\blacksquare = \text{Na}^+$ ;  $\bullet = \text{K}^+$ ;  $\blacktriangle = \text{Mg}^{2+}$ ;  $\blacktriangledown = \text{Ca}^{2+}$ ;  $\blacktriangleleft = \text{Mn}^{2+}$ ;  $\blacktriangleright = \text{Fe}^{2+}$ ;  $\blacklozenge = \text{Co}^{2+}$ ;  $\blackheartsuit = \text{Ni}^{2+}$ ;  $\bullet = \text{Cu}^{2+}$  and  $\star = \text{Zn}^{2+}$ .

#### S05. Minimum detection limit experiment

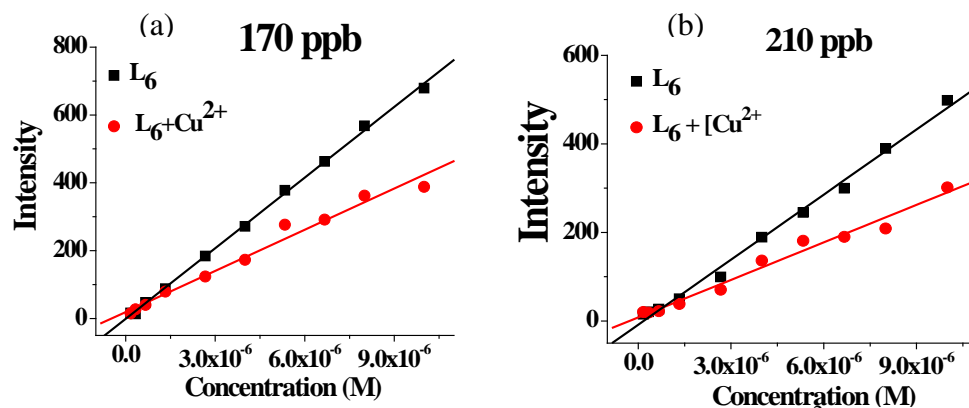

**Figure S05(a).** Dilution experiments carried out by keeping the  $[\text{Cu}^{2+}]/[\text{L}_6]$  mole ratio at 1:1: (a) in methanol (b) in aqueous acetonitrile.

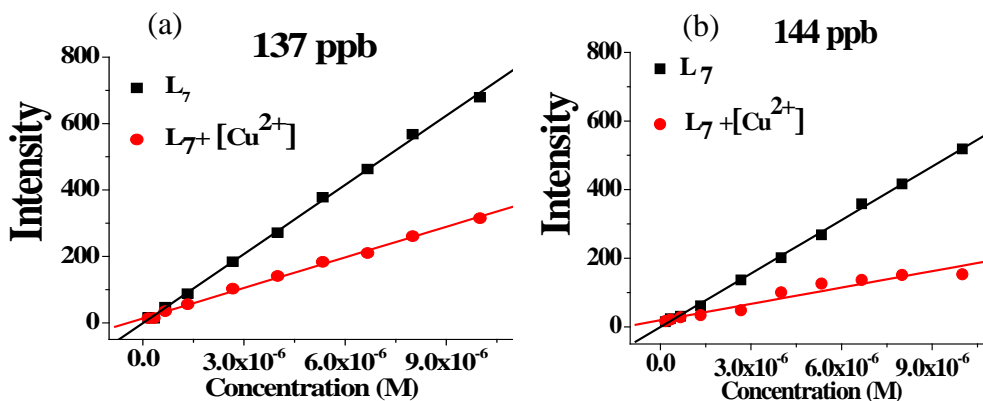

**Figure S05(b).** Dilution experiments carried out by keeping the  $[\text{Cu}^{2+}]/[\text{L}_7]$  mole ratio at 1:1: (a) in methanol (b) in aqueous acetonitrile.



### S06. Absorption titration studies

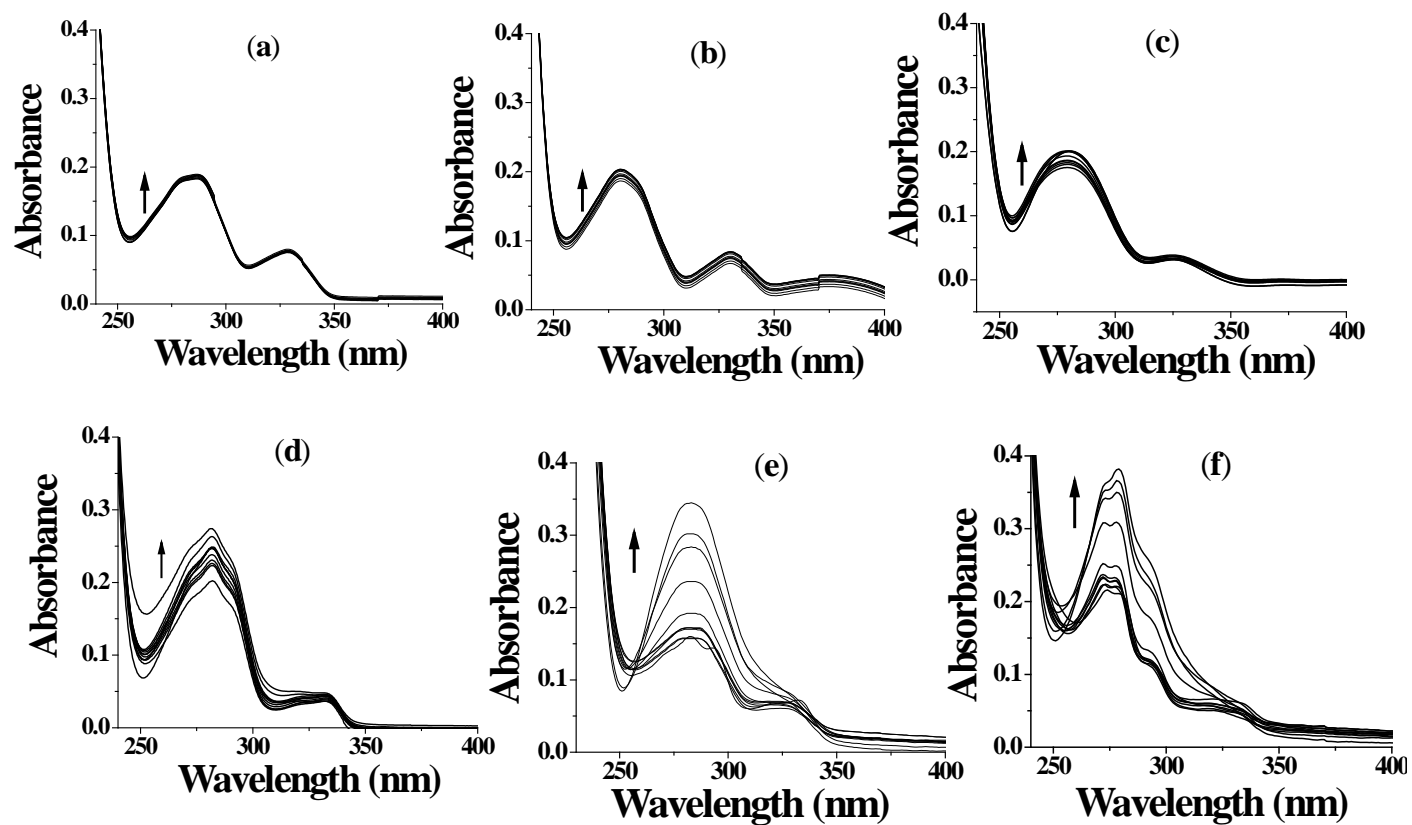

**Figure S06.** Absorption spectral traces for the titration of L<sub>1</sub> – L<sub>7</sub> with Cu<sup>2+</sup> in 50% aqueous acetonitrile: (a) L<sub>1</sub>, (b) L<sub>3</sub>, (c) L<sub>4</sub>, (d) L<sub>5</sub>, (e) L<sub>6</sub>, and (f) L<sub>7</sub>.

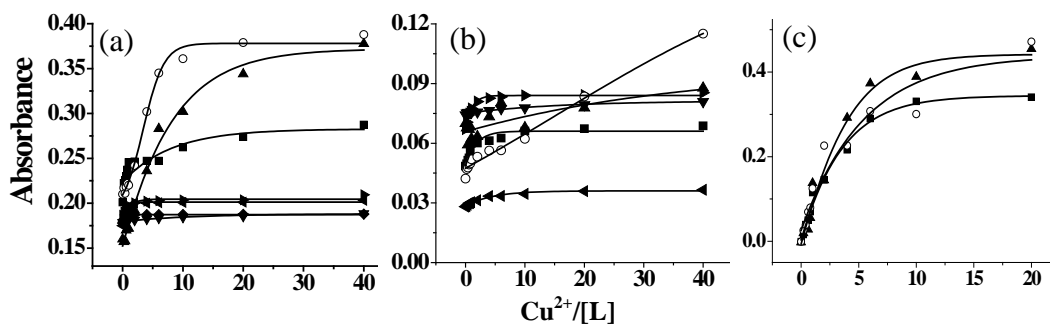

Titration of L with  $\text{Cu}^{2+}$  in 50% aqueous acetonitrile: Plot of absorbance vs. mole ratio of  $[\text{Cu}^{2+}]/[\text{L}]$  for (a) 280 nm band, (b) for 330 nm band (c) for 820 nm band. The symbols correspond to, B =  $\text{L}_1$ ;  $\Lambda$  =  $\text{L}_2$ ;  $\beta$  =  $\text{L}_3$ ;  $\Omega$  =  $\text{L}_4$ ;  $\blacksquare$  =  $\text{L}_5$ ;  $\heartsuit$  =  $\text{L}_6$ ; and  $\circ$  =  $\text{L}_7$ .

### S07. Job's plots

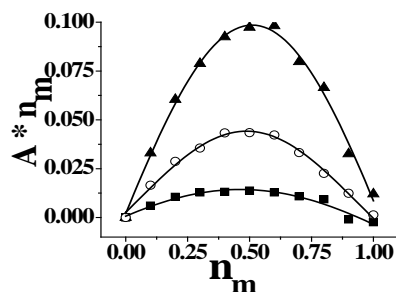

**Figure S07.** Job's plots for the titration of L with  $\text{Cu}^{2+}$  in aqueous acetonitrile where  $n_m$  is mole fraction of the metal ion added and A is absorbance. The symbols correspond to,  $\blacksquare$  =  $\text{L}_5$ ,  $\blacktriangle$  =  $\text{L}_6$  and  $\circ$  =  $\text{L}_7$ .

### S08. Mass spectral studies of $\text{L}_6$ and $\text{L}_7$ with $\text{Cu}^{2+}$

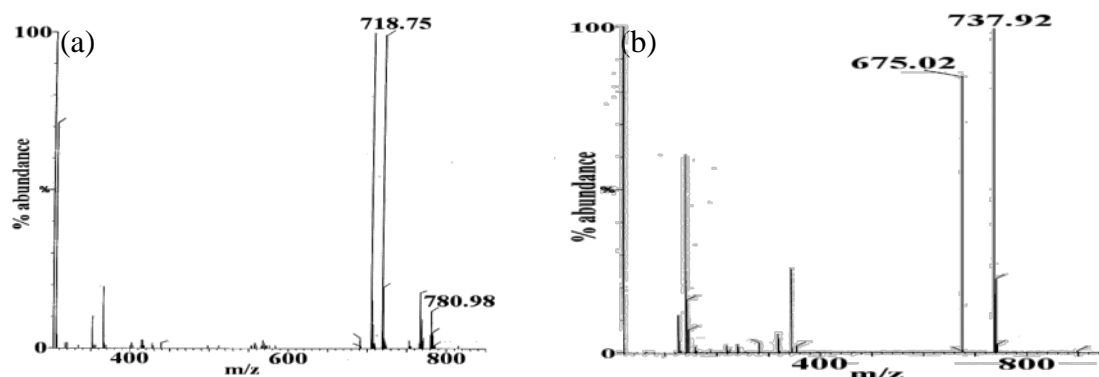

**Figure S08.** ESI mass spectrum showing the molecular ion peak for 1:1 complex formed between  $\text{Cu}^{2+}$  and  $\text{L}_6$  (a) &  $\text{Cu}^{2+}$  and  $\text{L}_7$  (b).

### S09. Competitive metal ion titrations

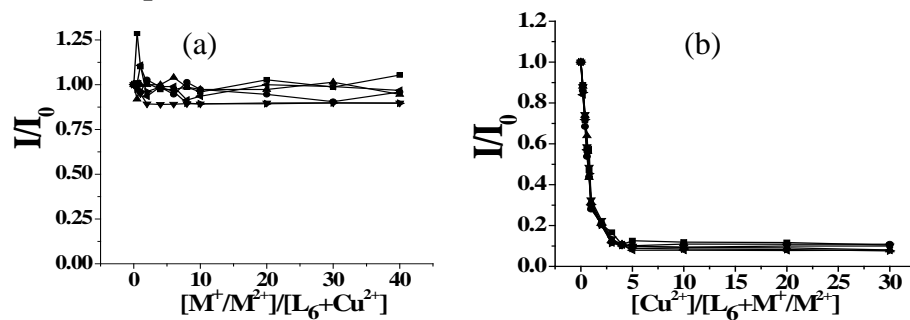

**Figure S09(a).** Plots of relative fluorescence intensity ( $I/I_0$ ): (a) Titration of  $\{L_6 + 5$  equivalents  $Cu^{2+}\}$  by  $M^{2+}$ ; (b) Titration of  $\{L_6 +$  equivalents  $M^{2+}\}$  by  $Cu^{2+}$ . The symbols correspond to,  $\blacksquare = Na^+$ ;  $\bullet = K^+$ ;  $\blacktriangle = Mg^{2+}$ ;  $\blacktriangledown = Ca^{2+}$ ;  $\blacktriangleleft = Cu^{2+}$ ;  $\blacktriangleright = Zn^{2+}$ .

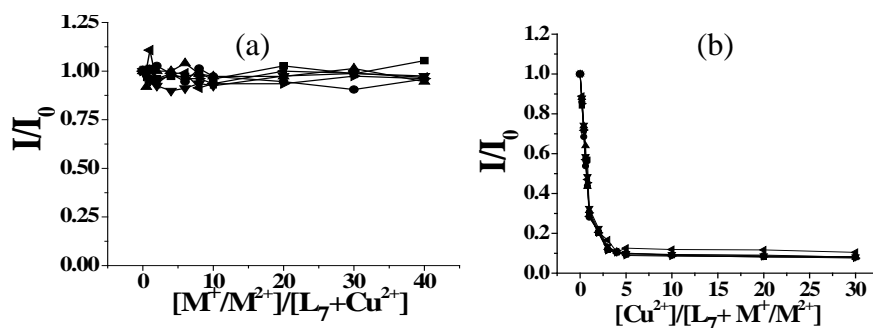

**Figure S09(b).** Plots of relative fluorescence intensity ( $I/I_0$ ): (a) Titration of  $\{L_7 + 5$  equivalents  $Cu^{2+}\}$  by  $M^{2+}$ ; (b) Titration of  $\{L_7 +$  equivalents  $M^{2+}\}$  by  $Cu^{2+}$ . The symbols correspond to,  $\blacksquare = Na^+$ ;  $\bullet = K^+$ ;  $\blacktriangle = Mg^{2+}$ ;  $\blacktriangledown = Ca^{2+}$ ;  $\blacktriangleleft = Cu^{2+}$ ;  $\blacktriangleright = Zn^{2+}$ .

### S10. $^1\text{H}$ NMR titration studies

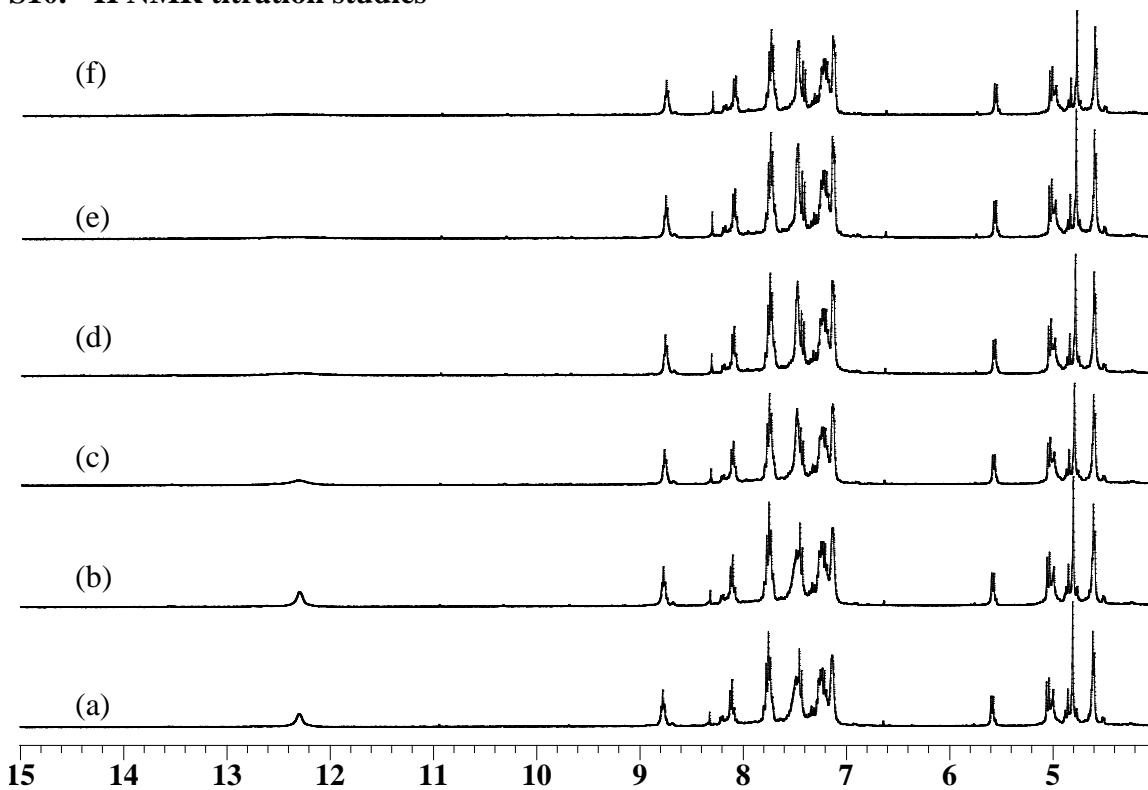

**Figure S10.**  $^1\text{H}$  NMR spectra measured during the titration of  $\text{L}_7$  with different mole ratios of  $\text{Zn}^{2+}$  (in  $\text{DMSO-d}_6$ ): (a) 0, (b) 0.02, (c) 0.04, (d) 0.08, (e) 0.1 and (f) 0.2.

## S11. Computational studies

All the calculations were performed by using Gaussian 03 package. The initial guess for the structure of  $L_6$  was obtained by appropriately modifying the crystal structure of  $L_2$  of *mbn* and optimizing the same in a cascade fashion starting from AM1  $\rightarrow$  HF/3-21G  $\rightarrow$  HF/6-31G. In order to bring both the arms on the same side to form a binding core, appropriate changes were made in the dihedral angles of the arms of  $L_6$  to mimic the dipicolyl derivative present in the crystal structure of its copper complex that was reported by us recently, and the model was optimized in HF/6-31G. At this stage,  $Cu^{2+}$  was placed away from the binding core ( $\text{\AA}$ ) of the optimized structure of  $L_6$  so that there are no interactions present between  $L_6$  and  $Cu^{2+}$  in the initial guess structure. This optimization has been carried out by DFT methods using B3LYP/3-21g\* initially and the resultant structure was further optimized by B3LYP/6-31g\*. The resultant structure has been further subjected to the interaction with one acetonitrile molecule. Further optimization carried out in presence of acetonitrile in B3LYP/6-31g\*

(a) Cartesian coordinates of  $L_6$  as obtained from HF/6-31G level of optimization

| Z | Cartesian Coordinates |              |              |
|---|-----------------------|--------------|--------------|
|   | x                     | y            | z            |
| 1 | -8.373639000          | -1.019379000 | 1.855630000  |
| 1 | -3.299142000          | -6.106402000 | -3.253501000 |
| 1 | -0.874047000          | -5.786668000 | -3.092272000 |
| 1 | -7.479328000          | 0.679648000  | 0.330020000  |
| 6 | -2.886415000          | -5.419693000 | -2.540044000 |
| 6 | -7.327887000          | -0.994857000 | 1.617927000  |
| 6 | -1.540143000          | -5.240453000 | -2.450897000 |
| 6 | -6.830206000          | -0.053489000 | 0.770904000  |
| 1 | -6.842412000          | -2.683555000 | 2.863350000  |
| 1 | -4.805375000          | -4.842760000 | -1.749326000 |
| 6 | -6.453383000          | -1.943743000 | 2.190179000  |
| 6 | -3.744453000          | -4.697036000 | -1.682786000 |
| 1 | 1.063022000           | -4.731097000 | -2.057072000 |
| 1 | -5.616916000          | 1.723641000  | -0.818069000 |
| 6 | -5.448405000          | -0.009343000 | 0.449622000  |
| 6 | -0.983535000          | -4.335703000 | -1.509907000 |
| 6 | 0.420909000           | -4.172280000 | -1.403280000 |
| 6 | -4.942681000          | 0.992673000  | -0.415072000 |
| 6 | -5.121329000          | -1.927826000 | 1.899768000  |

|   |              |              |              |
|---|--------------|--------------|--------------|
| 6 | -3.238232000 | -3.815298000 | -0.774365000 |
| 6 | -1.838163000 | -3.594833000 | -0.657078000 |
| 6 | -4.561627000 | -0.962300000 | 1.012690000  |
| 1 | -4.493406000 | -2.661462000 | 2.360082000  |
| 1 | -3.912154000 | -3.279380000 | -0.143472000 |
| 6 | 0.942790000  | -3.323106000 | -0.482986000 |
| 6 | -3.618470000 | 1.051379000  | -0.705675000 |
| 1 | -3.222042000 | 1.845299000  | -1.307672000 |
| 1 | 2.002015000  | -3.185591000 | -0.385418000 |
| 6 | -1.279013000 | -2.678123000 | 0.298523000  |
| 6 | -3.166557000 | -0.915738000 | 0.670184000  |
| 6 | 4.918021000  | 0.624288000  | 0.850874000  |
| 6 | 1.238713000  | 4.257335000  | -0.280274000 |
| 1 | 5.963104000  | 0.869067000  | 0.981775000  |
| 1 | 1.641828000  | 5.224961000  | -0.549578000 |
| 1 | 6.533774000  | -4.296606000 | 0.519024000  |
| 1 | -2.336455000 | 7.015271000  | -0.398816000 |
| 6 | 0.083677000  | -2.588032000 | 0.365046000  |
| 6 | -2.745342000 | 0.087606000  | -0.157008000 |
| 1 | 2.646089000  | -0.753624000 | 0.812533000  |
| 1 | -0.712162000 | 2.299583000  | -0.201937000 |

|   |              |              |              |
|---|--------------|--------------|--------------|
| 8 | -2.179625000 | 4.522169000  | -1.518057000 |
| 8 | 6.610602000  | -1.592616000 | 0.264770000  |
| 6 | -2.140422000 | -1.874795000 | 1.265165000  |
| 8 | -1.386093000 | 0.199110000  | -0.399592000 |
| 8 | 0.692405000  | -1.717507000 | 1.268990000  |
| 6 | -1.026216000 | 4.828056000  | -1.314031000 |
| 6 | 5.489017000  | -1.819272000 | 0.689162000  |
| 6 | -1.626213000 | 7.160525000  | -1.196706000 |
| 6 | 5.629811000  | -4.111734000 | -0.037599000 |
| 1 | 4.959750000  | -4.948942000 | 0.025796000  |
| 1 | -1.072870000 | 8.071870000  | -1.058491000 |
| 7 | 3.272158000  | -1.096724000 | 1.507842000  |
| 7 | -0.320671000 | 2.526734000  | -1.089750000 |
| 6 | 0.148509000  | 3.871171000  | -1.287693000 |
| 6 | 4.673800000  | -0.779309000 | 1.438894000  |
| 8 | 4.903772000  | -3.006295000 | 0.557167000  |
| 8 | -0.635898000 | 6.107420000  | -1.169217000 |
| 1 | -2.632353000 | -2.572936000 | 1.926544000  |
| 1 | -1.469523000 | -1.288730000 | 1.874494000  |
| 1 | -2.139069000 | 7.160804000  | -2.145086000 |
| 1 | 5.870009000  | -3.882661000 | -1.063150000 |
| 1 | -1.604491000 | 0.008794000  | -2.463389000 |
| 1 | 1.242369000  | -3.306809000 | 2.499470000  |

|   |              |              |              |
|---|--------------|--------------|--------------|
| 1 | 0.589559000  | 3.912299000  | -2.276096000 |
| 1 | 5.060814000  | -0.795332000 | 2.451290000  |
| 6 | 1.325044000  | -2.230375000 | 2.444717000  |
| 6 | -0.853253000 | 0.249715000  | -1.724329000 |
| 6 | -0.274988000 | 1.601985000  | -2.050352000 |
| 6 | 2.788322000  | -1.873326000 | 2.493453000  |
| 1 | 0.840138000  | -1.801229000 | 3.309219000  |
| 1 | -0.061732000 | -0.480381000 | -1.781804000 |
| 8 | 3.474671000  | -2.288243000 | 3.427733000  |
| 8 | 0.215531000  | 1.787055000  | -3.171855000 |
| 1 | 4.329989000  | 1.326920000  | 1.422562000  |
| 1 | 2.028727000  | 3.519894000  | -0.370814000 |
| 6 | 0.737301000  | 4.292153000  | 1.123568000  |
| 7 | -0.431337000 | 3.871728000  | 1.526401000  |
| 6 | -0.481848000 | 4.074258000  | 2.898592000  |
| 6 | 0.681024000  | 4.624004000  | 3.316714000  |
| 7 | 1.458985000  | 4.761656000  | 2.177938000  |
| 1 | -1.341138000 | 3.808959000  | 3.467006000  |
| 1 | 1.020603000  | 4.922022000  | 4.280293000  |
| 1 | 2.372415000  | 5.140689000  | 2.137328000  |
| 6 | 4.537228000  | 0.757744000  | -0.585455000 |

|   |             |              |              |
|---|-------------|--------------|--------------|
| 7 | 5.343313000 | 0.390143000  | -1.618640000 |
| 6 | 4.657608000 | 0.632770000  | -2.792295000 |
| 6 | 3.455210000 | 1.138346000  | -2.423163000 |
| 7 | 3.394983000 | 1.211301000  | -1.036580000 |
| 1 | 6.242276000 | -0.018380000 | -1.521349000 |
| 1 | 5.074366000 | 0.428927000  | -3.750129000 |
| 1 | 2.633289000 | 1.440616000  | -3.028901000 |

(b) Cartesian coordinates of  $[\text{Cu}(\text{L}_6)]^{2+}$  as obtained from B3LYP/6-31G\* level of optimisation.

| Z | Cartesian coordinates |              |              |
|---|-----------------------|--------------|--------------|
|   | x                     | y            | z            |
| 1 | 9.195723000           | -1.116709000 | -2.162950000 |
| 1 | 4.069951000           | -3.754648000 | 4.500673000  |
| 1 | 1.778346000           | -4.344579000 | 3.762055000  |
| 1 | 8.536673000           | 1.007581000  | -1.074432000 |
| 6 | 3.693364000           | -3.410043000 | 3.542174000  |
| 6 | 8.158539000           | -0.932939000 | -1.899938000 |
| 6 | 2.421410000           | -3.733184000 | 3.133420000  |
| 6 | 7.792246000           | 0.247627000  | -1.297001000 |
| 1 | 7.470008000           | -2.850928000 | -2.635966000 |
| 1 | 5.542440000           | -2.422752000 | 2.985718000  |

|   |              |              |              |
|---|--------------|--------------|--------------|
| 6 | 7.177564000  | -1.913992000 | -2.170924000 |
| 6 | 4.524279000  | -2.650486000 | 2.683147000  |
| 1 | 0.020751000  | -4.307760000 | 2.098396000  |
| 1 | 6.835989000  | 2.443276000  | -0.075838000 |
| 6 | 6.439011000  | 0.500890000  | -0.948151000 |
| 6 | 1.923547000  | -3.305537000 | 1.870223000  |
| 6 | 0.629392000  | -3.684822000 | 1.448326000  |
| 6 | 6.067533000  | 1.710423000  | -0.305851000 |
| 6 | 5.855173000  | -1.697450000 | -1.848863000 |
| 6 | 4.068672000  | -2.209397000 | 1.460891000  |
| 6 | 2.746573000  | -2.496962000 | 1.003431000  |
| 6 | 5.432071000  | -0.482999000 | -1.238566000 |
| 1 | 5.133933000  | -2.479860000 | -2.057403000 |
| 1 | 4.742782000  | -1.653004000 | 0.828788000  |
| 6 | 0.152304000  | -3.298541000 | 0.218001000  |
| 6 | 4.758535000  | 1.951156000  | 0.030382000  |
| 1 | 4.476973000  | 2.869683000  | 0.537159000  |
| 1 | -0.833710000 | -3.626009000 | -0.093480000 |
| 6 | 2.224961000  | -2.049762000 | -0.257020000 |
| 6 | 4.059136000  | -0.215756000 | -0.898026000 |
| 6 | -4.575535000 | -1.100484000 | -0.603375000 |
| 6 | -2.032512000 | 4.888714000  | -1.530193000 |
| 1 | -5.651321000 | -0.950084000 | -0.470722000 |
| 1 | -3.112722000 | 4.984708000  | -1.675439000 |
| 1 | -6.908633000 | -5.393594000 | -2.116676000 |
| 1 | -3.542902000 | 3.498333000  | 2.784519000  |
| 6 | 0.953789000  | -2.493645000 | -0.622974000 |
| 6 | 3.769528000  | 0.990556000  | -0.284191000 |
| 1 | -3.015350000 | -3.560386000 | -2.407617000 |
| 1 | 0.106264000  | 4.330246000  | -0.297602000 |
| 8 | -2.647694000 | 1.983840000  | 0.755654000  |
| 8 | -6.100613000 | -3.451276000 | -0.435343000 |
| 6 | 2.931345000  | -1.156506000 | -1.286754000 |
| 8 | 2.438889000  | 1.251107000  | 0.074978000  |
| 8 | 0.514682000  | -2.090154000 | -1.876903000 |
| 6 | -2.615020000 | 3.130499000  | 0.306849000  |
| 6 | -5.296486000 | -3.422368000 | -1.343905000 |
| 6 | -4.162655000 | 3.848890000  | 1.957868000  |
| 6 | -5.848676000 | -5.633013000 | -2.022061000 |
| 1 | -5.523652000 | -6.297408000 | -2.820157000 |
| 1 | -4.629625000 | 4.802358000  | 2.195691000  |
| 7 | -3.062725000 | -2.648847000 | -1.962441000 |
| 7 | -0.324839000 | 3.410108000  | -0.533201000 |
| 6 | -1.741719000 | 3.508361000  | -0.898417000 |
| 6 | -4.435045000 | -2.189990000 | -1.687985000 |



|   |              |              |              |
|---|--------------|--------------|--------------|
| 8 | -5.059197000 | -4.418662000 | -2.193262000 |
| 8 | -3.324021000 | 4.120465000  | 0.799193000  |
| 1 | 3.266259000  | -1.795084000 | -2.110765000 |
| 1 | 2.144142000  | -0.537335000 | -1.724074000 |
| 1 | -4.911535000 | 3.097614000  | 1.701959000  |
| 1 | -5.648508000 | -6.066779000 | -1.040963000 |
| 1 | 2.230630000  | 2.548174000  | -1.533987000 |
| 1 | -0.719577000 | -3.714007000 | -2.295212000 |
| 1 | -1.940741000 | 2.731229000  | -1.645713000 |
| 1 | -4.852322000 | -1.774784000 | -2.617317000 |
| 6 | -0.662649000 | -2.622686000 | -2.407900000 |
| 6 | 1.882646000  | 2.413570000  | -0.498684000 |
| 6 | 0.367529000  | 2.273145000  | -0.548707000 |
| 6 | -1.925423000 | -1.944507000 | -1.851878000 |
| 1 | -0.630970000 | -2.399832000 | -3.481544000 |
| 1 | 2.149566000  | 3.324956000  | 0.055482000  |
| 8 | -1.877684000 | -0.789239000 | -1.391025000 |
| 8 | -0.161674000 | 1.143772000  | -0.692966000 |
| 1 | -4.158531000 | -0.167685000 | -0.976820000 |
| 1 | -1.581003000 | 4.881794000  | -2.530873000 |
| 6 | -1.501009000 | 6.057119000  | -0.746992000 |
| 7 | -0.329403000 | 6.075993000  | -0.128250000 |
|   |              |              |              |

|    |              |              |              |
|----|--------------|--------------|--------------|
| 6  | -0.188800000 | 7.341314000  | 0.399962000  |
| 6  | -1.285111000 | 8.099718000  | 0.087000000  |
| 7  | -2.113644000 | 7.267525000  | -0.640288000 |
| 1  | 0.687340000  | 7.627213000  | 0.963416000  |
| 1  | -1.547329000 | 9.123424000  | 0.305375000  |
| 1  | -3.005565000 | 7.528359000  | -1.038954000 |
| 6  | -3.967521000 | -1.416503000 | 0.729439000  |
| 7  | -4.578462000 | -2.193021000 | 1.651753000  |
| 6  | -3.791956000 | -2.261233000 | 2.778666000  |
| 6  | -2.692528000 | -1.497979000 | 2.506501000  |
| 7  | -2.805864000 | -0.977206000 | 1.229011000  |
| 1  | -5.450896000 | -2.680895000 | 1.469464000  |
| 1  | -4.076369000 | -2.827916000 | 3.651554000  |
| 1  | -1.837561000 | -1.289405000 | 3.127173000  |
| 29 | -1.482780000 | 0.161959000  | 0.338655000  |
| 7  | -0.161314000 | 0.125658000  | 1.868675000  |
| 6  | 0.798565000  | 0.136578000  | 2.514173000  |
| 6  | 2.001561000  | 0.157503000  | 3.327882000  |
| 1  | 1.856491000  | 0.810500000  | 4.194354000  |
| 1  | 2.239263000  | -0.856414000 | 3.666398000  |
| 1  | 2.828403000  | 0.529627000  | 2.716023000  |
